# Supplementary material for: Stakeholder participation and crisis- responsive strategies in the Mediterranean blue bioeconomy-insights from Lebanon under Co-Evolve4BG project
Source: Frontiers journal article supplement (doi:10.3389/fmars.2025.1618637), 2025-08-04
Supplement: Table_1.docx [file Table_1.docx]

| Strengths | Weaknesses |
| --- | --- |
| - Presence of a complete wastewater network infrastructure system | - Violations on coastal public property |
| - Presence of a wastewater treatment plant | - Failure to inform the local population about development projects and financing schemes |
| - Strong environmental guidance | - Inadequate solid waste management plan, including lack of sorting from the source |
| - Public involvement in environmental activities (cleaning campaigns, individual initiatives, etc.) | - Insufficient awareness and environmental guidance |
| - Personal initiatives in sorting waste from the source | - Inaccessible coastal areas and beaches for the public |
| - Regular and consistent collection of solid waste from residential areas and public spaces. | - Groundwater pollution caused by sewage |
| - Banning the use of dynamite in the fishing sector | - Nonfully operational wastewater treatment plant |
| - Digitalized archaeological sites | - Chemical pollution from the Selaata chemical plant |
| - Existence of a landfill and a sorting facility for solid, organic, and nylon waste | - Aesthetic pollution is present |
| - Attempt to reduce noise pollution and switch to alternative energy sources such as solar energy and hydroelectric cars | - High number of displaced populations impacting the area |
| - Some beaches are safeguarded by official decree | - Risk of waste being brought to the sea by the El Jawz river |
|  | - Increasing waste disposal due to growing tourism |
|  | - Waste generated by maritime transport activities |
|  | - Overreliance on nonbiodegradable packaging |
|  | - Inadequate number of waste collection bins |
|  | - Noncompliance with environmental standards |
|  | - Beach erosion occurring |
|  | - Lack of specific guidelines and regulations for tourists |
| Opportunities | Threats |
| - Initiate the process of enacting laws | - Decrease in the fishing sector |
| - Advocate for the establishment of environmental police officers | - Existence of invasive species |
| - Reactivate aquaculture practices | - Native marine species such as sponges, murex, and sea urchins are becoming extinct or scarce |
| - Restore coastal habitats | - High amount of marine litter and microplastics present |
| - Establish a program for monitoring health and the environment | - Insufficient ability to manage tourist numbers |
|  | - Unsustainable financing methods for operating the wastewater treatment plant |
