# Supplementary material for: Stakeholder participation and crisis- responsive strategies in the Mediterranean blue bioeconomy-insights from Lebanon under Co-Evolve4BG project
Source: Frontiers journal article supplement (doi:10.3389/fmars.2025.1618637), 2025-08-04
Supplement: Table_2.docx [file Table_2.docx]

| **Thematic** | **Objectives** | **Actions** | **Key players** |
| --- | --- | --- | --- |
| Environment | Solid waste management | •    Update of waste management plan | Local authority Local community |
| •    Repurpose of reusable materials |  |
| •    Carry out the implementation of the solid waste management plan, especially sorting from source |  |
| Habitat degradation | •   Eliminate violations along the coastline, particularly in protected areas, and implementing taxes on constructions that cannot be removed | Local authority |
| Ministry of Environment (MoE) |
| Infrastructure | •     Enhance the capacity of the wastewater treatment facility in Batroun by upgrading the pumping system to deal with the overflows | Local authority |
| •     Collaborate closely with displaced populations to prevent the discharge of their wastewater into the El-Jaouz River and monitor their waste that causes blockages in the pumping system | Local community |
| •     Install public restroom facilities in tourist spots and beaches |  |
| Pollution | •    Imposing and levying taxes on plastic waste disposal in the environment | Local authority |
| •    Activate the sorting from the source process, and increasing the number of bins in streets, beaches, and public areas |  |
| Regulations | •    Need to enforce the environmental regulations at the Selaata plant to prevent water, air, and beach pollution. This can be achieved by putting more pressure on the union of municipalities to comply with the standards | Local authority |
| Ministry of Agriculture (MoA) |
| MoE |
| •   Commence the operations of the nearest coast guard station, located in Chekka (11 km north Batroun) |  |
| •   Have environmental inspectors/officers operating within the municipal boundaries, preferably recruited from outside the city to avoid conflicts of interest |  |
| •   Implement environmentally friendly solutions to restore eroded beaches and areas, such as planting vegetation, conducting beach nourishment, etc. |  |
| •   Provide unrestricted access to the beaches and some areas |  |
| Awareness | Local community | •    Activate the networking community | Local authority |
| •    Increase awareness through school programs and community events | Local community |
| •    Establish closer collaboration and work alongside Lebanese diaspora donors to further environmental and developmental projects in Batroun. |  |
| Sustainable tourism | Blue economy | •    Inclusion of circular economy to minimize waste, such as repurposing discarded fishing nets by recycling them into sponges for cleaning dishes, etc. | Local authority |
| •    Expand the municipal police force to enhance monitoring capacity in relation to the tourism influx | Local community |
| •    Promote the adoption of sustainable and eco-friendly substitutes for plastic use in the hospitality industry (hotels, resorts, public beaches, etc.), such as aluminum bottles, cloth bags, etc. |  |
| •    Establish a marketplace where diving equipment can be rented out |  |
| •    Enable fishermen to discover and adopt new methods for selling their catch, such as producing fish pickles, etc. |  |
| Fisheries | •    Activation and enforcement of the marine fishing law. | Local authority |
| •    Develop a strategy for revitalizing and overseeing eco-tourism activities that can benefit local fishermen and small enterprises | MoE |
| •    Collaboration among fish sellers in the market to standardize prices and regulations and generating QR code for this purpose | MoA |
| •    Provide support to fishermen by arranging fishing expeditions in deep sea waters and introducing aquaculture | Ministry of Public Works and Transport (MPWT) |
| •    Support and empower the fishermen cooperative to thrive and establish a local marketplace for their catch |  |
| •    Have a well-equipped boat for deep-sea fishing, managed either by the fishermen cooperative or MARSATI, in order to assist and support fishermen |  |
| Archaeology | •   Modify the current master plan for the archaeological area to accommodate the current population needs | Local authority |
| •   Finish up the cultural and heritage projects |  |
| Transport |  | •    Impose and levy a tax on road violators and infractions | Local authority |
| Energy |  | •    Implement alternative energy sources, such as solar power, to provide electricity for the wastewater treatment plant and electric vehicles | Local authority |
